# Supplementary material for: Microstructure and Physicochemical Properties of Light Ice Cream: Effects of Extruded Microparticulated Whey Proteins and Process Design
Source: MDPI journal article supplement (doi:10.3390/foods10061433), 2021-06-21
Supplement: s1 [file s1]

## Supplementary information

**Table S1** Correlation and regression table of physicochemical properties of ice creams.

|                    | PH_Fir<br>(1) | HP_Fir<br>(2) | PH_Mel<br>(3) | HP_Mel<br>(4) | PH_Ove<br>(5) | HP_Ove<br>(6) | PH_Vis<br>(7) | HP_Vis<br>(8) | PH_DM<br>(9) | HP_DM<br>(10) | PH_Pro<br>(11) | HP_Pro<br>(12) | PH_Fat<br>(13) | HP_Fat<br>(14) |
|--------------------|---------------|---------------|---------------|---------------|---------------|---------------|---------------|---------------|--------------|---------------|----------------|----------------|----------------|----------------|
| PH_Firmness (1)    | 1             |               |               |               |               |               |               |               |              |               |                |                |                |                |
| HP_Firmness (2)    | 0.94***       | 1             |               |               |               |               |               |               |              |               |                |                |                |                |
| PH_Melting (3)     | 0.39          | 0.45          | 1             |               |               |               |               |               |              |               |                |                |                |                |
| HP_Melting (4)     | 0.23          | 0.22          | 0.29          | 1             |               |               |               |               |              |               |                |                |                |                |
| PH_Overrun (5)     | 0.03          | -0.07         | 0.32          | 0.09          | 1             |               |               |               |              |               |                |                |                |                |
| HP_Overrun (6)     | 0.02          | 0.04          | 0.32          | 0.20          | -0.17         | 1             |               |               |              |               |                |                |                |                |
| PH_Viscosity (7)   | -0.42         | -0.58*        | -0.68**       | -0.23         | -0.05         | -0.27         | 1             |               |              |               |                |                |                |                |
| HP_Viscosity (8)   | 0.38          | 0.35          | -0.15         | -0.39         | -0.02         | -0.50*        | 0.28          | 1             |              |               |                |                |                |                |
| PH_Dry Matter (9)  | -0.45         | -0.47*        | -0.28         | -0.12         | -0.04         | -0.26         | 0.08          | -0.19         | 1            |               |                |                |                |                |
| HP_Dry Matter (10) | -0.58*        | -0.50*        | -0.45         | -0.52*        | -0.18         | -0.04         | 0.40          | 0.04          | 0.22         | 1             |                |                |                |                |
| PH_Protein (11)    | 0.49*         | 0.55*         | 0.74**        | 0.44          | 0.18          | 0.44          | -0.63*        | -0.03         | -0.16        | -0.62*        | 1              |                |                |                |
| HP_Protein (12)    | 0.60*         | 0.71*         | 0.49*         | 0.21          | 0.04          | 0.38          | -0.62*        | 0.18          | -0.45        | -0.37         | 0.69**         | 1              |                |                |
| PH_Fat (13)        | -0.58*        | -0.46         | -0.39         | -0.41         | -0.21         | 0.11          | 0.01          | -0.18         | 0.50*        | 0.43          | -0.19          | -0.19          | 1              |                |
| HP_Fat (14)        | -0.55*        | -0.43         | -0.31         | -0.64*        | -0.15         | 0.01          | 0.02          | 0.01          | 0.45         | 0.50*         | -0.22          | -0.18          | 0.94***        | 1              |

PH – Pasteurization with subsequent homogenization.

HP – Homogenization with subsequent pasteurization.

\* Significant level at  $p < 0.05$

\*\* Significant level at  $p < 0.01$

\*\*\* Significant level at  $p < 0.001$
